# Supplementary material
Source: HighWire-hosted journal article supplement (https://openheart.bmj.com/content/5/1/e000710)
Supplement: inline-supplementary-material-4 [file inline-supplementary-material-4.docx]

**Supplemental Table 1:**  Reclassification of the ESC-SCORE according to hs-cTnT >14 ng/L

|  | **Study Population** | | | **Non-secondary prevention** | | | **Secondary prevention** | | | |
| --- | --- | --- | --- | --- | --- | --- | --- | --- | --- | --- |
|  | NRI  categorial | NRI  contiuous | IDI | NRI  categorial | NRI  contiuous | IDI | NRI  categorial | | NRI  continuous | IDI |
| **All-cause Mortality** |  |  |  |  |  |  |  | |  |  |
|  | **0.4326** | **1.0142** | **0.0213** | **0.5868** | **1.3994** | **0.0207** | **0.2939** | | **0.8485** | **0.0213** |
| 95%CI | **0.1784-0.6868** | **0.6152-1.4133** | **0.0137-0.0289** | **0.0519-1.1217** | **1.2978-1.5009** | **0.0185-0.0230** | **0.0019 - 0.5859** | | **0.3417 - 1.3552** | **0.0094 - 0.0333** |
| p-value | **<0.001** | **<0.001** | **<0.001** | **0.04** | **<0.001** | **<0.001** | **0.05** | | **0.001** | **<0.001** |
|  |  |  |  |  |  |  |  | |  |  |
|  |  |  |  |  |  |  |  | |  |  |
| **All-cause mortality, acute myocardial infarction, stroke** | | | | | | | | | | |
|  | **0.4183** | **0.7949** | **0.0214** | 0.0620 | 0.5409 | 0.0027 | | **0.7700** | **0.8500** | **0.0378** |
| 95%CI | **0.1266-0.7101** | **0.446-1.1437** | **0.0075-0.0354** | -0.1991-0.323 | -0.1994-1.2812 | -0.0153-0.0207 | | **0.3905-1.1494** | **0.4685-1.2314** | **0.0195-0.0561** |
| p-value | **0.005** | **<0.001** | **0.003** | NS (0.64178) | NS (0.15212) | NS (0.76726) | | **<0.001** | **<0.001** | **<0.001** |
|  |  |  |  |  |  |  | |  |  |  |
|  |  |  |  |  |  |  | |  |  |  |
| **All-cause mortality, acute myocardial infarction, stroke, rehospitalization for acute coronary syndrome or decompensated heart failure** | | | | | | | | | | |
|  | **0.3768** | **0.7537** | **0.0548** | 0.1845 | 0.3459 | 0.0042 | | **0.3703** | **0.8683** | **0.1066** |
| 95%CI | **0.2618-0.4918** | **0.5237-0.9837** | **0.0372-0.0724** | -0.0988-0.4679 | -0.1399-0.8316 | -0.0044-0.0127 | | **0.2539-0.4866** | **0.6127-1.1239** | **0.0748-0.1385** |
| p-value | **<0.001** | **<0.001** | **<0.001** | NS (0.20173) | NS (0.16284) | NS (0.33833) | | **<0.001** | **<0.001** | **<0.001** |
|  |  |  |  |  |  |  | |  |  |  |
